# Supplementary material for: Who Should Finance the Supply Chain? Impact of Credit Ratings on Supply Chain Decisions
Source: Atypon-hosted journal article supplement (doi:10.1287/msom.2017.0669), 2017-12-12
Supplement: msom.2017.0669-sm.pdf [file msom.2017.0669-sm.pdf]

## Appendix

LEMMA EC.1. For  $r_s \geq \delta_r(C_r)$ , we have the following derivatives:

$$\frac{\partial \bar{k}_b(r_s; C_r)}{\partial r_s} = 1/[(1+r_s)z(\bar{k}_b(r_s; C_r))], \quad (\text{EC.1})$$

$$\frac{\partial \bar{y}_b(r_s; C_r)}{\partial r_s} = 1/[(1+r_s)^2 z(\bar{k}_b(r_s; C_r))], \quad (\text{EC.2})$$

$$\frac{\partial \bar{r}_b(r_s; C_r)}{\partial r_s} = [r_s - \bar{r}_b(r_s; C_r)]/[(1+r_s)^2 \bar{y}_b(r_s; C_r) z(\bar{k}_b(r_s; C_r))]. \quad (\text{EC.3})$$

**Proof of Lemma EC.1:** From Equation (7),  $\frac{\partial \bar{k}_b}{\partial r_s} = \frac{1+\delta_r(C_r)}{(1+r_s)^2 F(k_b) z(k_b)} = \frac{1}{(1+r_s) z(k_b)}$ . From Equation (4),  $\frac{\partial \bar{y}_b}{\partial k_b} = \frac{\bar{F}(\bar{k}_b)}{1+\delta_r(C_r)} = \frac{1}{1+r_s}$ . Then,  $\frac{\partial \bar{y}_b}{\partial r_s} = \frac{\partial \bar{y}_b}{\partial k_b} \cdot \frac{\partial \bar{k}_b}{\partial r_s} = \frac{1}{(1+r_s)^2 z(k_b)}$ . From  $\bar{k}_b = \bar{y}_b(1+\bar{r}_b)$ , we have  $\frac{\partial \bar{k}_b}{\partial \bar{y}_b} = 1+\bar{r}_b + \bar{y}_b \frac{\partial \bar{r}_b}{\partial \bar{y}_b}$ . Since  $\frac{\partial \bar{y}_b}{\partial k_b} = \frac{1}{1+r_s}$ , we have  $\frac{\partial \bar{r}_b}{\partial \bar{y}_b} = \frac{r_s - \bar{r}_b}{\bar{y}_b}$ . Then,  $\frac{\partial \bar{r}_b}{\partial r_s} = \frac{\partial \bar{r}_b}{\partial \bar{y}_b} \cdot \frac{\partial \bar{y}_b}{\partial r_s} = \frac{r_s - \bar{r}_b}{(1+r_s)^2 \bar{y}_b z(k_b)}$ .  $\square$

COROLLARY EC.1. For  $0 \leq r_s < \tilde{r}_s(y_r, C_r)$ ,  $\partial[-\bar{y}_b(r_s; C_r)(1+r_s) + \bar{k}_b(r_s; C_r)]/\partial r_s = -\bar{y}_b(r_s; C_r)$ .

**Proof of Corollary EC.1:** The conclusion holds if  $0 \leq r_s < \delta_r(C_r)$ , since  $\bar{y}_b = \bar{k}_b = 0$ . For  $\delta_r(C_r) \leq r_s < \tilde{r}_s$ ,  $\frac{\partial[-\bar{y}_b(1+r_s) + \bar{k}_b]}{\partial r_s} = -(1+r_s) \frac{\partial \bar{y}_b}{\partial r_s} - \bar{y}_b + \frac{\partial \bar{k}_b}{\partial r_s} = -\bar{y}_b$ , from Equations (EC.1) and (EC.2).  $\square$

**Proof of Lemma 1:** From Equation (4),  $\frac{\partial k_b}{\partial y_b} = \frac{1+\delta_r(C_r)}{F(k_b)} \geq 0$  and  $k_b$  increases and  $\bar{F}(k_b)$  decreases in  $y_b$ . From Equations (5) and (6a),  $\frac{\partial \pi}{\partial y_b} = -\bar{F}(k_s) \frac{\partial k_s}{\partial y_b} = \bar{F}(k_s) [(1+r_s) - \frac{1+\delta_r(C_r)}{F(k_b)}]$  so that  $\pi$  is quasi-concave in  $y_b$ . Then, for  $r_s \geq \delta_r(C_r) = \frac{\epsilon_r(C_r) + \lambda_r(C_r)}{1 - \lambda_r(C_r)}$ , the optimal  $y_b$  solves  $\frac{\partial \pi}{\partial y_b} = 0$ , i.e.,  $\bar{F}(k_b) = \frac{1+\delta_r(C_r)}{1+r_s}$ , and for  $0 \leq r_s \leq \delta_r(C_r)$ , the optimal  $y_b = 0$ . Note that  $\bar{y}_b(1+\delta_r(C_r)) = \mathbb{E}[\min(\xi, \bar{k}_b)] \geq \bar{k}_b \bar{F}(\bar{k}_b) = \bar{y}_b(1+\bar{r}_b) \frac{1+\delta_r(C_r)}{1+r_s}$ . Then,  $\bar{r}_b \leq r_s$ . Consequently, from Lemma EC.1,  $\frac{\partial \bar{r}_b}{\partial r_s} \geq 0$ .  $\square$

**Proof of Lemma 2:** Note that  $q\bar{F}(q)$  is quasi-concave in  $q$  and the largest value is achieved at  $\tilde{q}$  that solves  $qz(q) = 1$ . From Lemma EC.1,  $(y_r + \bar{y}_b)(1 + \min\{\delta_r(C_r), r_s\})$  increases in  $r_s$  and  $y_r$ . This establishes the existence of  $\tilde{y}_r(C_r)$  and  $\tilde{r}_s(y_r, C_r)$ . Then, for a given  $r_s \in [0, \tilde{r}_s)$ , there are two solutions of  $q$  to each of Equations (9a)-(9c). Let  $q_i^u \geq q_i^l$ , for  $i = 1, 2, 3$ , be the solutions to (9a)-(9c), respectively. Then,  $q_3^u \geq q_2^u \geq q_1^u \geq \tilde{q} \geq q_1^l \geq q_2^l \geq q_3^l$  since for the right hand side,  $(9a) \geq (9b) \geq (9c)$ .

For Equations (6a), (6b), and (6d), the optimal  $q$  satisfies  $\bar{F}(q) - w(1+r_s)\bar{F}(k_s) = 0$ ,  $\bar{F}(q) = w(1+\delta_r(C_r))$  and  $\bar{F}(q) = w$ , respectively. Then, the boundary of (6c) and (6d) is  $wq = q\bar{F}(q) = y_r$ , which is (9c). If  $r_s > \delta_r(C_r)$ , then since  $y_b = \bar{y}_b$ ,  $wq = y_r + \bar{y}_b$  and  $k_s = \bar{k}_b$  at the boundary of (6a) and (6b), we have  $wq = \frac{q\bar{F}(q)}{1+\delta_r(C_r)} = y_r + \bar{y}_b$ , which is (9a). Similarly, the boundary of (6b) and (6c) is  $wq = \frac{q\bar{F}(q)}{1+\delta_r(C_r)} = y_r$ , which is (9b). If  $r_s \leq \delta_r(C_r)$ , (6b) does not exist and  $\bar{y}_b = 0$ . Since  $wq = y_r$  and  $k_s = 0$  at the boundary of (6a) and (6c), we have  $wq = \frac{q\bar{F}(q)}{1+r_s} = y_r$ , which is (9b).  $\square$

LEMMA EC.2. For a fixed  $r_s$  so that  $\delta_r(C_r) < r_s \leq \tilde{r}_s(y_r, C_r)$ , we have  $q_1^l(r_s; C_r) > \bar{k}_b(r_s; C_r)$ .

**Proof of Lemma EC.2:** Since  $r_s > \delta_r(C_r)$ ,  $\bar{y}_b > 0$  and  $q_1^l > 0$ . Then,  $w_1^l q_1^l (1 + \delta_r(C_r)) = q_1^l \bar{F}(q_1^l) < \mathbb{E}[\min(\xi, q_1^l)]$ . As  $\bar{y}_b(1 + \delta_r(C_r)) = \mathbb{E}[\min(\xi, \bar{k}_b)] = (w_1^l q_1^l - y_r)(1 + \delta_r(C_r)) < \mathbb{E}[\min(\xi, q_1^l)]$ ,  $q_1^l > \bar{k}_b$ .  $\square$

LEMMA EC.3. Let  $y_r > 0$ . For  $w \in [w_1^u(r_s; C_r), w_1^l(r_s; C_r)]$ , or equivalently,  $q^*(w, r_s; C_r) \in [q_1^l(r_s; C_r), q_1^u(r_s; C_r)]$ , we have  $w(1+r_s) < 1$ ,  $k_s^*(w, r_s; C_r) < q^*(w, r_s; C_r)$ , and  $1 - M^*(w, r_s; C_r) > 0$ .

**Proof of Lemma EC.3:** Since  $y_r > 0$ ,  $q_1^l > 0$ . Note that  $w(1+r_s) \leq w_1^l(1+r_s) = \frac{\bar{F}(q_1^l)(1+r_s)}{1 + \min\{\delta_r(C_r), r_s\}} < 1$  if  $r_s \leq \delta_r(C_r)$ . If  $r_s > \delta_r(C_r)$ , from Equation (7) and Lemma EC.2,  $w(1+r_s) \leq \frac{\bar{F}(q_1^l)(1+r_s)}{1+\delta_r(C_r)} = \frac{\bar{F}(q_1^l)}{\bar{F}(\bar{k}_b)} < 1$ .

Then, from Equation (10a),  $k_s^* < q^*$ . Finally, since  $y_r > 0$  and  $\bar{r}_b \leq r_s$  from Lemma 1,  $k_s^* = (wq^* - y_r)(1 + r_s) - \bar{y}_b(r_s - \bar{r}_b) < wq^*(1 + r_s)$ . Then,  $q^* \bar{F}(q^*) = wq^*(1 + r_s) \bar{F}(k_s^*) > wq^*(1 + r_s) \bar{F}(wq^*(1 + r_s))$ . Since  $w(1 + r_s) < 1$ ,  $wq^*(1 + r_s) < \tilde{q}$ . Thus,  $1 - M^* > 1 - wq^*(1 + r_s)z(wq^*(1 + r_s)) > 0$ .  $\square$

**Proof of Lemma 3:** The result directly follows from Lemma EC.3.  $\square$

LEMMA EC.4. For a fixed  $r_s \geq 0$ ,  $q^*(w, r_s; C_r)$  and  $\pi^*(w, r_s; C_r)$  strictly decrease in  $w$ , for  $w \in (0, 1]$ .

**Proof of Lemma EC.4:** From Lemma EC.3 and Equations (10a) and (6a),  $\frac{\partial q^*}{\partial w} = \frac{q^*(1-M^*)}{w[M^*-q^*z(q^*)]} < 0$ , and  $\frac{\partial \pi^*}{\partial w} = \frac{\partial \pi}{\partial q}|_{q=q^*} \frac{\partial q^*}{\partial w} + \frac{\partial \pi}{\partial w} = \frac{\partial \pi}{\partial w} = -(1-\rho_r(C_r))\bar{F}(k_s^*)q^*(1+r_s) < 0$ . Proofs for other cases are similar.  $\square$

LEMMA EC.5. For any given  $r_s \geq r_f$ , the optimal order quantity to the supplier is in  $[0, \tilde{q}]$ .

**Proof of Lemma EC.5:** Let  $\hat{q}_1$  solve the first order condition of Equation (11a), i.e.,  $\frac{\bar{F}(\hat{q}_1)[1-\hat{q}_1z(\hat{q}_1)]}{1-M^*} - \frac{c(1+\delta_s(C_s))}{1-\rho_r(C_r)} = 0$ . From Lemma EC.3,  $1-M^* \geq 0$ . Then,  $\hat{q}_1 \leq \tilde{q}$ . We can show (11b)-(11e) similarly.  $\square$

**Proof of Lemma 4:** Let  $\Delta(r_s) = 1 + \min\{\delta_r(C_r), r_s\}$ . Recall  $q_1^l \leq \tilde{q}$  solving  $q_1^l \bar{F}(q_1^l) = (y_r + \bar{y}_b)\Delta(r_s)$ . Let  $H(r_s) = q_y \bar{F}(q_y) - q_1^l \bar{F}(q_1^l) = q_y[\bar{F}(q_y) - c\Delta(r_s)]$ . Then, for  $q_y \leq \tilde{q}$ , we have  $q_y \geq q_1^l$  if  $H(r_s) \geq 0$ , and  $q_y < q_1^l$  otherwise. Since  $\bar{F}(q_y)$  decreases in  $r_s$  (strictly if  $r_s \geq \delta_r(C_r)$ ) and  $c\Delta(r_s)$  increases in  $r_s$  (strictly if  $r_s \leq \delta_r(C_r)$ ),  $H(r_s)$  strictly decreases in  $r_s$  and there is at most one  $\bar{r}_s$  satisfying  $H(\bar{r}_s) = 0$ . For Part 1, as  $c \leq \tilde{w}(C_r) = \frac{\bar{F}(\tilde{q})}{\Delta(\bar{r}_s)}$ ,  $q_1^l(\bar{r}_s; C_r) = \tilde{q} = \frac{y_r + \bar{y}_b(\bar{r}_s; C_r)}{\bar{F}(\tilde{q})/\Delta(\bar{r}_s)} \leq \frac{y_r + \bar{y}_b(\bar{r}_s; C_r)}{c} = q_y(\bar{r}_s; C_r)$ . Since  $q_y$  increases in  $r_s$ , there is an  $r_s^0 \in [0, \bar{r}_s]$  so that  $q_y \geq \tilde{q} \geq q_1^l$  for  $r_s \in [r_s^0, \bar{r}_s]$  and  $q_y(r_s^0; C_r) = \tilde{q}$ . Then,  $\bar{F}(q_y(r_s^0; C_r)) = \bar{F}(\tilde{q}) \geq c\Delta(\bar{r}_s) \geq c\Delta(r_s^0)$ . Thus,  $H(r_s^0) \geq 0$  and  $H(r_s) \geq 0$ , i.e.,  $q_y \geq q_1^l$ , for  $r_s \in [0, r_s^0]$ . For Part 2,  $q_1^l(\bar{r}_s; C_r) = \tilde{q} \geq q_y(\bar{r}_s; C_r)$  so that  $H(\bar{r}_s) \leq 0$  and  $q_y \leq \tilde{q}$  for  $r_s \in [0, \bar{r}_s]$ . Suppose  $H(0) < 0$  so that  $\bar{F}(\frac{y_r}{c}) < c$ . Then,  $\frac{y_r}{c} \bar{F}(\frac{y_r}{c}) < y_r = q_3^l \bar{F}(q_3^l)$  so that  $\frac{y_r}{c} < q_3^l$ , i.e.,  $\bar{F}(\frac{y_r}{c}) > \bar{F}(q_3^l) \geq c$ . Contradiction. Then,  $H(0) \geq 0$  and  $\bar{r}_s \in [0, \bar{r}_s)$ . Since  $q_y$  increases in  $y_r$ ,  $\bar{r}_s$  decreases in  $y_r$ .  $\square$

LEMMA EC.6. If  $z(\cdot)$  is increasing and convex,  $\frac{\bar{F}(q)[1-qz(q)]}{1-M^*(q, r_s; C_r)}$  decreases in  $q$ , for  $q \leq \tilde{q}$ .

**Proof of Lemma EC.6:** From Equation (10a),  $\frac{\partial w^*}{\partial q} = \frac{w^*[M^*-qz(q)]}{q(1-M^*)}$ . As  $w^*(1+r_s) < 1$  and  $k_s^* < q$  from Lemma EC.3,  $0 \leq \frac{1-qz(q)}{1-M^*} \leq 1$  and  $0 \leq \frac{\partial k^*}{\partial q} = \frac{\partial(w^*q(1+r_s))}{\partial q} = \frac{w^*(1+r_s)[1-qz(q)]}{1-M^*} < 1$ . As  $z(k_s^*) \leq z(q)$  and  $z'(k_s^*) \leq z'(q)$ ,  $\partial \frac{1-qz(q)}{1-M^*} / \partial q = \frac{1}{1-M^*} \left\{ \frac{1-qz(q)}{1-M^*} \left[ \frac{\partial(w^*q(1+r_s))}{\partial q} z(k_s^*) + w^*(1+r_s) \frac{\partial k_s^*}{\partial q} z'(k_s^*) \right] - z(q) - qz'(q) \right\} \leq 0$ .  $\square$

For a given  $r_s$ ,  $\hat{q}(r_s; C_r, \alpha)$  and  $w^*(\hat{q}(r_s; C_r, \alpha), r_s; C_r)$ , where  $\alpha = \alpha_1$  or  $\alpha_2$ , are solutions of

$$\begin{cases} V^1(q, w) = qf(q) - \bar{F}(q) - c(1+\alpha)[w(1+r_s)qz(k_s) - 1] = 0, & \text{(EC.4a)} \\ V^2(q, w) = \bar{F}(q) - w(1+r_s)\bar{F}(k_s) = 0, & \text{(EC.4b)} \end{cases}$$

where  $k_s$  is defined in Equation (5), Equation (EC.4a) is the supplier's first order condition (12a) ( $\alpha = \alpha_1$ ) or (12b) ( $\alpha = \alpha_2$ ), and Equation (EC.4b) is the retailer's first order condition (10a). Then,

$$V_q^1 = \bar{F}(q) \{ q[z'(q) - (c(1+\alpha)/\bar{F}(q))(w(1+r_s))^2 z'(k_s)] + z(q)(1-qz(q)) + [z(q) - (c(1+\alpha)/\bar{F}(q))w(1+r_s)z(k_s)] \} \geq 0, \quad \text{(EC.5)}$$

$$V_w^1 = -c(1+\alpha)(1+r_s)q[z(k_s) + w(1+r_s)qz'(k_s)] \leq 0, \quad \text{(EC.6)}$$

$$V_q^2 = -\bar{F}(q)[z(q) - w(1+r_s)z(k_s)] \leq 0, \quad \text{(EC.7)}$$

$$V_w^2 = -(1+r_s)\bar{F}(k_s)[1 - w(1+r_s)qz(k_s)] \leq 0, \quad \text{(EC.8)}$$

where inequalities hold from Lemma EC.5 ( $qz(q) \leq 1$ ), Lemma EC.3 ( $k_s < q$ ,  $w(1+r_s) < 1$ ,  $1-M \geq 0$ ), IFR with convex feature ( $z(q) \geq z(k_s)$ ,  $z'(q) \geq z'(k_s)$ ), and Equation (EC.4a) ( $\frac{c(1+\alpha)}{\bar{F}(q)} = \frac{1-qz(q)}{1-M} \leq 1$ ).

LEMMA EC.7. For a given  $r_s \geq 0$ , we have  $\hat{q}(r_s; C_r, \alpha)$ ,  $w^*(\hat{q}(r_s; C_r, \alpha), r_s; C_r)\hat{q}(r_s; C_r, \alpha)(1+r_s)$  and  $k_s^*(\hat{q}(r_s; C_r, \alpha), r_s; C_r)$  all decrease in  $y_r$ , where  $\alpha$  is either  $\alpha_1$  or  $\alpha_2$ .

**Proof of Lemma EC.7:** From Equations (EC.4a) and (EC.4b),  $V_{y_r}^1 = c(1+\alpha)(1+r_s)M \frac{z'(k_s)}{z(k_s)} \geq 0$ ,  $V_{y_r}^2 = -(1+r_s)\bar{F}(q)z(k_s) \leq 0$ . Let  $B = V_q^1 V_w^2 - V_w^1 V_q^2$ ,  $B_q = V_w^1 V_{y_r}^2 - V_{y_r}^1 V_w^2$ , and  $B_w = V_{y_r}^1 V_q^2 - V_q^1 V_{y_r}^2$ . Then,  $B \leq 0$  and  $B_q \geq 0$ . From implicit function theorem,  $\frac{\partial q}{\partial y_r} = \frac{B_q}{B} \leq 0$ ,  $\frac{\partial w}{\partial y_r} = \frac{B_w}{B}$ ,  $\frac{\partial(wq)}{\partial y_r} = q \frac{\partial w}{\partial y_r} + w \frac{\partial q}{\partial y_r} = \frac{(1+r_s)M}{B} \{c(1+\alpha)\bar{F}(q) \left[ \frac{z'(k_s)}{z(k_s)}(1-qz(q)+M) + z(k_s) \right] + \bar{F}(k_s)V_q^1\} \leq 0$ , and  $\frac{\partial k_s}{\partial y_r} = (1+r_s) \left[ \frac{\partial(wq)}{\partial y_r} - 1 \right] \leq 0$ .  $\square$

LEMMA EC.8. We have  $\hat{q}(r_s; C_r, \alpha)$ ,  $w^*(\hat{q}(r_s; C_r, \alpha), r_s; C_r)$ ,  $w^*(\hat{q}(r_s; C_r, \alpha), r_s; C_r)\hat{q}(r_s; C_r, \alpha)(1+r_s)$ ,  $k_s^*(\hat{q}(r_s; C_r, \alpha), r_s; C_r)$ , and  $M^*(\hat{q}(r_s; C_r, \alpha), r_s; C_r)$  all decrease in  $r_s$ , where  $\alpha$  is  $\alpha_1$  or  $\alpha_2$ .

**Proof of Lemma EC.8:** From Equations (EC.4a) and (EC.4b),  $V_{r_s}^1 = -c(1+\alpha)wq[z(k_s) + (wq - y_r - \bar{y}_b)(1+r_s)z'(k_s)] \leq 0$ . Also,  $V_{r_s}^2 = -w\bar{F}(k_s)[1 - (wq - y_r - \bar{y}_b)(1+r_s)z(k_s)] \leq 0$ , as  $1 - M \geq 0$  from Lemma EC.3. Let  $B = V_q^1 V_w^2 - V_w^1 V_q^2$ ,  $B_q = V_w^1 V_{r_s}^2 - V_{r_s}^1 V_w^2$  and  $B_w = V_{r_s}^1 V_q^2 - V_q^1 V_{r_s}^2$ . Then,  $B \leq 0$ ,  $B_w \geq 0$  and  $\frac{\partial w}{\partial r_s} = \frac{B_w}{B} \leq 0$ . Substituting  $V_j^1$  and  $V_j^2$  for  $j = q, w, r_s$  yields  $B_q = (y_r + \bar{y}_b)(1+r_s)q\bar{F}(q)c(1+\alpha)(z'(k_s) + z^2(k_s)) \geq 0$  and  $B = -(1+r_s)(1-M)[P - c^2(1+\alpha)^2(z(k_s) + wq(1+r_s)z'(k_s))]$ , where  $P = \bar{F}(q)\bar{F}(k_s)[2z(q) + qz'(q) - qz^2(q)] \geq c^2(1+\alpha)^2(z(k_s) + wq(1+r_s)z'(k_s))$ . Then,

$$\frac{\partial q}{\partial r_s} = \frac{B_q}{B} = -\frac{(y_r + \bar{y}_b)q\bar{F}(q)c(1+\alpha)[z'(k_s) + z^2(k_s)]}{(1-M)[P - c^2(1+\alpha)^2(z(k_s) + wq(1+r_s)z'(k_s))]} \leq 0. \quad (\text{EC.9})$$

From  $k_s = (wq - y_r - \bar{y}_b)(1+r_s) + \bar{y}_b(1 + \bar{r}_b)$  and  $\frac{\partial k_s}{\partial r_s} = q(1+r_s)\frac{\partial w}{\partial r_s} + w(1+r_s)\frac{\partial q}{\partial r_s} + (wq - y_r - \bar{y}_b)$ ,

$$\frac{\partial k_s}{\partial r_s} = -\frac{(y_r + \bar{y}_b)}{1-M} \cdot \frac{P - c^2(1+\alpha)^2 z(k_s)(1-M)}{P - c^2(1+\alpha)^2(z(k_s) + wq(1+r_s)z'(k_s))} \leq 0, \quad (\text{EC.10})$$

since  $P - c^2(1+\alpha)^2 z(k_s)(1-M) \geq P - c^2(1+\alpha)^2(z(k_s) + wq(1+r_s)z'(k_s)) \geq 0$ . Also, since  $\frac{1}{1-M} \cdot \frac{P - c^2(1+\alpha)^2 z(k_s)(1-M)}{P - c^2(1+\alpha)^2(z(k_s) + wq(1+r_s)z'(k_s))} \geq 1$ , we have  $\frac{\partial k_s}{\partial r_s} \leq -(y_r + \bar{y}_b)$  and  $\frac{\partial[wq(1+r_s)]}{\partial r_s} = \frac{\partial k_s}{\partial r_s} + (y_r + \bar{y}_b) \leq 0$ . Finally,  $\frac{\partial M}{\partial r_s} = \frac{\partial[wq(1+r_s)]}{\partial r_s} z(k_s) + wq(1+r_s)z'(k_s) \frac{\partial k_s}{\partial r_s} = \frac{(y_r + \bar{y}_b)}{1-M} \frac{P[-wq(1+r_s)z^2(k_s) - wq(1+r_s)z'(k_s)]}{P - c^2(1+\alpha)^2(z(k_s) + wq(1+r_s)z'(k_s))} \leq 0$ .  $\square$

**Proof of Proposition 1:**  $\hat{q}(r_s; C_r, \alpha_1) \leq \hat{q}(r_s; C_r, \alpha_2) \leq \tilde{q}$  from Lemma EC.5. From Lemma 4 and

for  $c \leq \frac{\bar{F}(\tilde{q})}{1 + \min\{\delta_r(C_r), \bar{r}_s\}}$ ,  $q_y \geq q_1^l$  for all  $r_s \in [0, \tilde{r}]$ . Then, from Equations (12a) and (12b),  $\hat{q}(r_s; C_r, \alpha_1)$  is realizable only if  $\hat{q}(r_s; C_r, \alpha_1) \geq q_y$  and  $\hat{q}(r_s; C_r, \alpha_2)$  is realizable only if  $q_1^l \leq \hat{q}(r_s; C_r, \alpha_2) \leq q_y$ .

From Lemmas EC.8 and EC.1,  $\hat{q}(r_s; C_r, \alpha_1)$  and  $\hat{q}(r_s; C_r, \alpha_2)$  decrease in  $r_s$  and  $q_y$  and  $q_1^l$  increase in  $r_s$ . Then, for a given  $y_r$ , there exist thresholds  $r_s^1(C_r, \alpha_1) \leq r_s^2(C_r, \alpha_2) \leq r_s^3(C_r, \alpha_2) \leq \tilde{r}_s$  so that

a)  $r_s^1$  is defined by  $\hat{q}(r_s; C_r, \alpha_1) = q_y$ . For  $r_s < r_s^1$ ,  $\hat{q}(r_s; C_r, \alpha_1) > q_y$  is realizable and  $\hat{q}^o = \hat{q}(r_s; C_r, \alpha_1)$ .

b)  $r_s^2$  is defined by  $\hat{q}(r_s; C_r, \alpha_2) = q_y$ . For  $r_s^1 < r_s < r_s^2$ ,  $\hat{q}(r_s; C_r, \alpha_1) < q_y < \hat{q}(r_s; C_r, \alpha_2)$  so that neither

$\hat{q}(r_s; C_r, \alpha_1)$  nor  $\hat{q}(r_s; C_r, \alpha_2)$  are realizable. Then,  $\hat{q}^o = q_y$ .

c)  $r_s^3$  is defined by  $\hat{q}(r_s; C_r, \alpha_2) = q_1^l$ . For  $r_s^2 < r_s < r_s^3$ , we have  $q_1^l < \hat{q}(r_s; C_r, \alpha_2) < q_y$  is realizable.

Then,  $\hat{q}^o = \hat{q}(r_s; C_r, \alpha_2)$ . For  $r_s^3 < r_s \leq \tilde{r}_s$ ,  $\hat{q}(r_s; C_r, \alpha_2) < q_1^l$  is not realizable. Then,  $\hat{q}^o = q_1^l$ .

Note that  $r_s^1$  may not exist if  $\hat{q}(r_s; C_r, \alpha_1) \neq q_y(r_s; C_r)$  for any  $r_s \geq 0$ . This may happen if  $y_r$  is relatively large, since  $q_y$  increases in  $y_r$  and  $\hat{q}(r_s; C_r, \alpha_1)$  decreases in  $y_r$  from Lemma EC.7. Then, there is a threshold  $y_r^1 \geq 0$  that solves  $\hat{q}(0; C_r, \alpha_1) = q_y(0; C_r)$ . For  $y_r < y_r^1$ ,  $r_s^1 > 0$  and decreases in  $y_r$ ,

and for  $y_r > y_r^1$ ,  $\hat{q}(r_s; C_r, \alpha_1) < q_y(r_s; C_r)$  for any  $r_s \geq 0$  and  $r_s^1$  does not exist (we let  $r_s^1 = 0$  for ease of exposition). Similarly, there are two thresholds  $y_r^2$  and  $y_r^3$  that solve  $\hat{q}(0; C_r, \alpha_2) = q_y(0; C_r)$  and  $\hat{q}(0; C_r, \alpha_2) = q_1^l(0; C_r)$ , respectively. We have  $0 \leq y_r^1 \leq y_r^2 \leq y_r^3$  since  $\hat{q}(0; C_r, \alpha_1) \leq \hat{q}(0; C_r, \alpha_2)$  and  $q_1^l \leq q_y$ . If  $y_r \in [0, y_r^1]$ ,  $r_s^i \geq 0$  for  $i = 1, 2, 3$ , if  $y_r \in (y_r^1, y_r^2]$ ,  $r_s^i \geq 0$  for  $i = 2, 3$  but  $r_s^1 = 0$ , if  $y_r \in (y_r^2, y_r^3]$ ,  $r_s^3 \geq 0$  but  $r_s^1 = r_s^2 = 0$ , and if  $y_r \in (y_r^3, \tilde{y}_r)$ ,  $r_s^1 = r_s^2 = r_s^3 = 0$ . Please refer to Figures 3-6.  $\square$

**Proof of Proposition 2:** From Equations (12a)-(12e), candidates of the global optimal ordering quantity are  $\hat{q}^o(r_s; C_r, C_s)$ ,  $\bar{q}(0)$ ,  $q_3^l$ , and  $\bar{q}(\delta_r(C_r))$ . Let  $\hat{r}_s^\#$  and  $\hat{q}^o(\hat{r}_s^\#; C_r, C_s)$  be the optimal trade credit rate and ordering quantity, respectively, in the trade/combined financing region, where  $q_1^l$  is the region boundary (see Figure 3). For any  $r_s \in [0, \tilde{r}_s]$ ,  $q_1^l(r_s; C_r)$  is dominated by  $\hat{q}^o(\hat{r}_s^\#; C_r, C_s)$  since  $\Pi(q_1^l(r_s; C_r), r_s; C_r, C_s) \leq \Pi(\hat{q}^o(r_s; C_r, C_s), r_s; C_r, C_s) \leq \Pi(\hat{q}^o(\hat{r}_s^\#; C_r, C_s), \hat{r}_s^\#; C_r, C_s)$ .

Note that  $\Pi(q, r_s; C_r, C_s)$  does not change in  $r_s$  for  $q = q_3^l$ ,  $\bar{q}(\delta_r(C_r))$ , and  $\bar{q}(0)$ . From  $q_3^l = q_1^l(0; C_r)$ ,  $q_3^l$  is dominated by  $\hat{q}^o(\hat{r}_s^\#; C_r, C_s)$ . If  $\bar{q}(\delta_r(C_r)) < q_3^l$ , then  $\bar{q}(\delta_r(C_r))$  is not realizable. If  $q_3^l \leq \bar{q}(\delta_r(C_r)) \leq q_2^l(\delta_r(C_r); C_r)$ , then  $\bar{q}(\delta_r(C_r))$  is dominated by  $q_3^l$ , since for  $q \in [q_3^l, q_2^l(\delta_r(C_r); C_r)]$ , the retailer orders with all working capital and the supplier charges  $w_3^l$  (see Figures 1, 2 and 3). Finally, if  $\bar{q}(\delta_r(C_r)) > q_2^l(\delta_r(C_r); C_r)$ , there exists a  $r'_s$  so that  $\bar{q}(\delta_r(C_r)) = q_1^l(r'_s; C_r)$  and  $\bar{q}(\delta_r(C_r))$  is dominated by  $\hat{q}^o(\hat{r}_s^\#; C_r, C_s)$ . As a result, we do not need to consider  $\bar{q}(\delta_r(C_r))$  explicitly.

Then, we next only consider  $\bar{q}(0)$  and  $\hat{q}^o(r_s; C_r, C_s)$ . Since  $q_1^l(r_s; C_r)$  increases in  $y_r$  and  $\bar{q}(0)$  does not change in  $y_r$ , there exists a  $y_r^{31}$  so that  $q_1^l(0; C_r) = \bar{q}(0)$  at  $y_r = y_r^{31}$ . For  $y_r < y_r^{31}$ ,  $q_1^l = q_1^l(0; C_r) < \bar{q}(0)$  so that  $\bar{q}(0)$  is not realizable (see Figures 3 and 4). As a result,  $\hat{q}^o(r_s; C_r, C_s)$  is the only remaining candidate, and thus is the global optimal solution. If  $y_r^{31} \geq y_r^3$ , since at  $y_r = y_r^3$ , we have  $q_1^l(0; C_r) = \hat{q}(0; C_r, \alpha_2)$ , then for  $y_r \geq y_r^{31} > y_r^3$ ,  $\hat{q}^o(r_s; C_r, C_s) = q_1^l(r_s; C_r)$  for  $0 \leq r_s < \tilde{r}_s$ . Note that  $q_1^l(r_s; C_r)$  is dominated by  $\bar{q}(0)$ , since it is on the boundary of no financing region. Then, the global optimal is  $\bar{q}(0)$ . Alternatively, if  $y_r^{31} < y_r^3$ , then in the same logic, the global optimal is  $\bar{q}(0)$  for  $y_r \geq y_r^3$ . For  $y_r^{31} < y_r < y_r^3$ , we have to compare  $\Pi(\hat{q}^o(\hat{r}_s^\#; C_r, C_s), \hat{r}_s^\#; C_r, C_s)$  and  $\Pi(\bar{q}(0), r_s; C_r, C_s)$  to determine the global optimal. Combine the two cases, the global optimal is  $\hat{q}^o(\hat{r}_s^\#; C_r, C_s)$  for  $y_r \leq y_r^{31}$ , is  $\bar{q}(0)$  for  $y_r \geq \max\{y_r^{31}, y_r^3\}$ , and is either  $\hat{q}^o(\hat{r}_s^\#; C_r, C_s)$  or  $\bar{q}(0)$  for  $y_r^{31} \leq y_r < \max\{y_r^{31}, y_r^3\}$ .

Recall that  $\Pi(\bar{q}(0), r_s; C_r, C_s)$  does not change in  $r_s$  (the retailer's profit does not change in  $r_s$  as well). Then, the global optimal trade credit rate can just be determined from  $\hat{r}_s^\#$ .  $\square$

Let  $w^o(r_s; C_r, C_s) = w^*(\hat{q}^o, r_s; C_r)$ ,  $k_s^o(r_s; C_r, C_s) = k_s^*(\hat{q}^o, r_s; C_r)$ ,  $M^o(r_s; C_r, C_s) = M^*(\hat{q}^o, r_s; C_r)$ , and  $\Pi^o(r_s; C_r, C_s) = \Pi(\hat{q}^o, r_s; C_r, C_s)$ . Let  $A(r_s; C_r, C_s) \equiv \frac{\bar{F}(\hat{q}^o)[1 - \hat{q}^o z(\hat{q}^o)]}{c}$ ,  $D(r_s; C_r, C_s) \equiv \frac{A(r_s; C_r, C_s)}{1 - M^o(r_s; C_r, C_s)} - 1$ , and  $G(r_s; C_r, C_s) \equiv \frac{1 - M^o(r_s; C_r, C_s)}{F(k_s^o(r_s; C_r, C_s))}$ . From Equation (EC.4a),  $D(r_s; C_r, C_s) = \alpha_1$  for  $r_s \in [0, r_s^1)$ , and  $D(r_s; C_r, C_s) = \alpha_2$  for  $r_s \in [r_s^2, r_s^3)$ . Let the indicator  $\mathbb{1}_\Omega = 1$  if the condition  $\Omega$  holds and 0 otherwise.

From Proposition 1, for  $r_s^1(C_r, \alpha_1) \leq r_s \leq r_s^2(C_r, \alpha_2)$ ,  $q_y(r_s; C_r)$  is the optimal quantity satisfying

$$V^3(q, w) = cq - y_r - \bar{y}_b(r_s; C_r) = 0, \quad (\text{EC.11})$$

with  $V_q^3 = c \geq 0$  and  $V_w^3 = 0$ . The optimal  $q$  and  $w$  are solutions of Equations (EC.11) and (EC.4b).

LEMMA EC.9. For  $r_s^1(C_r, \alpha_1) \leq r_s \leq r_s^2(C_r, \alpha_2)$ , since  $\hat{q}^o(r_s; C_r, C_s) = q_y(r_s; C_r)$ , we have

$$\frac{\partial \hat{q}^o(r_s; C_r, C_s)}{\partial r_s} = \frac{1}{c} \cdot \frac{\partial \bar{y}_b(r_s; C_r)}{\partial r_s} \geq 0, \quad (\text{EC.12})$$

$$\frac{\partial k_s^o(r_s; C_r, C_s)}{\partial r_s} = \frac{1}{\bar{F}(k_s^o(r_s; C_r, C_s))} \left[ -\frac{y_r + \bar{y}_b(r_s; C_r)}{G(r_s; C_r, C_s)} + (D(r_s; C_r, C_s) + 1) \frac{\partial \bar{y}_b(r_s; C_r)}{\partial r_s} \right] \quad (\text{EC.13})$$

**Proof of Lemma EC.9:** From Equations (EC.11) and (EC.4b),  $V_{r_s}^3 = -\frac{\partial \bar{y}_b}{\partial r_s}$  and  $V_{r_s}^2 = -w\bar{F}(k_s) [1 - (wq - y_r - \bar{y}_b)(1 + r_s)z(k_s)] \leq 0$ . Let  $B = V_q^3 V_w^2 - V_w^3 V_q^2 = V_q^3 V_w^2 \leq 0$ ,  $B_q = -V_{r_s}^3 V_w^2 + V_w^3 V_{r_s}^2 = -V_{r_s}^3 V_w^2 \leq 0$ , and  $B_w = -V_q^3 V_{r_s}^2 + V_{r_s}^3 V_q^2 \geq 0$ . Then,  $\frac{\partial q}{\partial r_s} = \frac{B_q}{B} = -\frac{V_{r_s}^3 V_w^2}{V_q^3 V_w^2} = \frac{1}{c} \cdot \frac{\partial \bar{y}_b}{\partial r_s} \geq 0$ . Since  $\frac{\partial w}{\partial r_s} = \frac{B_w}{B}$ , we have  $\frac{\partial k_s}{\partial r_s} = q(1 + r_s) \frac{\partial w}{\partial r_s} + w(1 + r_s) \frac{\partial q}{\partial r_s} + (wq - y_r - \bar{y}_b) = -\frac{y_r + \bar{y}_b}{1-M} + \frac{\bar{F}(q)[1 - qz(q)]}{c\bar{F}(k_s)(1-M)} \cdot \frac{\partial \bar{y}_b}{\partial r_s}$ .  $\square$

LEMMA EC.10. In the trade/combined financing region, we have the following derivatives

$$\begin{aligned} \frac{\partial \Pi^o(r_s; C_r, C_s)}{\partial r_s} &= (1 - \rho_s(C_s))(1 - \rho_r(C_r)) \cdot \\ &\left\{ \begin{aligned} &\left[ -\frac{y_r + \bar{y}_b(r_s; C_r)}{G(r_s; C_r, C_s)} + (D(r_s; C_r, C_s) - \delta_r(C_r)) \frac{\partial \bar{y}_b(r_s; C_r)}{\partial r_s} \right], \quad r_s \in [0, r_s^3(C_r, \alpha_2)), \quad (\text{EC.14a}) \\ &\left[ -\frac{y_r \mathbb{1}_{r_s \leq \delta_r(C_r)}}{A(r_s; C_r, C_s)} + \left(1 - \frac{1 + \delta_r(C_r)}{A(r_s; C_r, C_s)}\right) \frac{\partial \bar{y}_b(r_s; C_r)}{\partial r_s} \right] (1 + \alpha_2) \leq 0, \quad r_s \in [r_s^3(C_r, \alpha_2), \tilde{r}_s(y_r, C_r)] \end{aligned} \right. \quad (\text{EC.14b}) \end{aligned}$$

**Proof of Lemma EC.10:** For notational convenience, let  $\Omega = (1 - \rho_s(C_s))(1 - \rho_r(C_r))$ . From Equations (11a) and (11b),  $\frac{\partial \Pi^o}{\partial r_s} = \Omega [\bar{F}(k_s) \frac{\partial k_s}{\partial r_s} - c(1 + \alpha) \frac{\partial q}{\partial r_s} + (\alpha - \delta_r(C_r)) \frac{\partial \bar{y}_b}{\partial r_s}]$ , where  $\alpha = \alpha_1$  or  $\alpha = \alpha_2$  and where  $\frac{\partial k_s}{\partial r_s}$  and  $\frac{\partial q}{\partial r_s}$  are in Equations (EC.10) and (EC.9) for  $r_s \in [0, r_s^1) \cup [r_s^2, r_s^3)$ . Then,  $\frac{\partial \Pi^o}{\partial r_s} = \Omega \left\{ -\frac{(y_r + \bar{y}_b)\bar{F}(k_s)}{1-M} - \delta_r(C_r) \frac{\partial \bar{y}_b}{\partial r_s} + \alpha \frac{\partial \bar{y}_b}{\partial r_s} \right\} = \Omega \left\{ -\frac{y_r + \bar{y}_b}{G} + [D - \delta_r(C_r)] \frac{\partial \bar{y}_b}{\partial r_s} \right\}$ . For  $r_s \in [r_s^1, r_s^2)$ , from Equation (EC.13),  $\frac{\partial \Pi^o}{\partial r_s} = \Omega \left\{ \bar{F}(k_s) \frac{\partial k_s}{\partial r_s} - (1 + \delta_r(C_r)) \frac{\partial \bar{y}_b}{\partial r_s} \right\} = \Omega \left\{ -\frac{y_r + \bar{y}_b}{G} + [D - \delta_r(C_r)] \frac{\partial \bar{y}_b}{\partial r_s} \right\}$ .

For  $r_s \in [r_s^3, \tilde{r}_s)$ , from Proposition 1, the optimal  $q = q_1^l(r_s; C_r)$  satisfying  $V^4 = q\bar{F}(q) - [y_r + \bar{y}_b(r_s; C_r)](1 + \min\{\delta_r(C_r), r_s\}) = 0$ . Then,  $V_q^4 = \bar{F}(q)[1 - qz(q)] = cA \geq 0$ ,  $V_{r_s}^4 = -y_r \mathbb{1}_{r_s \leq \delta_r(C_r)} - (1 + \delta_r(C_r)) \frac{\partial \bar{y}_b}{\partial r_s} \leq 0$ , and  $\frac{\partial q}{\partial r_s} = -\frac{V_{r_s}^4}{V_q^4} = \frac{1}{cA} [y_r \mathbb{1}_{r_s \leq \delta_r(C_r)} + (1 + \delta_r(C_r)) \frac{\partial \bar{y}_b}{\partial r_s}] \geq 0$ . From  $k_s = \bar{k}_b$  and Equations (7), (EC.1), and (EC.2),  $\bar{F}(k_s) \frac{\partial k_s}{\partial r_s} = (1 + \delta_r(C_r)) \frac{\partial \bar{y}_b}{\partial r_s}$ . From Equation (11b),  $\frac{\partial \Pi^o}{\partial r_s} = \Omega \left\{ \bar{F}(k_s) \frac{\partial k_s}{\partial r_s} - c(1 + \alpha_2) \frac{\partial q}{\partial r_s} + (\alpha_2 - \delta_r(C_r)) \frac{\partial \bar{y}_b}{\partial r_s} \right\} = \Omega(1 + \alpha_2) \left\{ \frac{\partial \bar{y}_b}{\partial r_s} - c \frac{\partial q}{\partial r_s} \right\} = \Omega(1 + \alpha_2) \left\{ -\frac{y_r \mathbb{1}_{r_s \leq \delta_r(C_r)}}{A} + \frac{\partial \bar{y}_b}{\partial r_s} \left[ 1 - \frac{1 + \delta_r(C_r)}{A} \right] \right\} \leq 0$ , where “ $\leq$ ” holds from  $\frac{1 + \delta_r(C_r)}{A} \geq \frac{c(1 + \alpha_2)}{\bar{F}(q)[1 - qz(q)]} \geq \frac{1}{1-M} \geq 1$  as  $q = q_1^l \geq \hat{q}(r_s; C_r, \alpha_2)$ .  $\square$

**Proof of Proposition 3:** Note that  $r_s^2 = 0$  at  $y_r = y_r^2$ , and  $r_s^2 = \delta_r(C_r) \geq 0$  at  $y_r = y_r^{21}$ . From the proof of Proposition 1,  $r_s^2$  decreases in  $y_r$ . Then,  $y_r^{21} \leq y_r^2$ . From Equations (EC.14a) and (EC.14b) and  $D = \alpha_2 \leq \delta_r(C_r)$  for  $r_s \in [r_s^2, r_s^3)$ , we have  $\frac{\partial \Pi^o}{\partial r_s} \leq 0$  for  $r_s \in [r_s^2, \tilde{r}_s)$ . Then, the optimal  $r_s \in [0, r_s^2)$ . For  $y_r \geq y_r^{21}$ , we have  $r_s^2 \leq \delta_r(C_r)$  so that  $\frac{\partial \bar{y}_b}{\partial r_s} = 0$ . From Equation (EC.14a), the supplier's profit decreases in  $r_s$  for  $r_s \leq \delta_r(C_r)$  so that  $r_s^\#(C_r, C_s) = 0$ . For  $y_r < y_r^{21}$ , we have  $r_s^2 > \delta_r(C_r)$ . In the same logic, the supplier's profit decreases in  $r_s$  for  $r_s \leq \delta_r(C_r)$ . Then,  $r_s^\# \in \{0\} \cup [\delta_r(C_r), r_s^2)$ .  $\square$

LEMMA EC.11. For  $y_r < y_r^{21}$  so that  $r_s^2(C_r, \alpha_2) > \delta_r(C_r)$ , if  $y_r \geq y_r^{22}$  where  $y_r^{22}$  is a threshold, then the supplier's profit  $\Pi^o(r_s; C_r, C_s)$  is quasi-concave in  $r_s$  for  $r_s \in (\delta_r(C_r), r_s^2(C_r, \alpha_2))$ .

**Proof of Lemma EC.11:** We first show  $D = \frac{\bar{F}(q)(1 - qz(q))}{c(1 - M)} - 1$  decreases in  $r_s$ . It holds for  $r_s \in [0, r_s^1) \cup [r_s^2, r_s^3)$ , since  $D$  is constant. For  $r_s \in [r_s^1, r_s^2)$ ,  $\frac{\partial M}{\partial r_s} = \frac{\partial [wq(1 + r_s)]}{\partial r_s} z(k_s) + wq(1 + r_s) z'(k_s) \frac{\partial k_s}{\partial r_s} = -\frac{wq(1 + r_s)[z'(k_s) + z^2(k_s)]}{1 - M} +$

$\frac{wq(1+r_s)z'(k_s)+z(k_s)}{c} \frac{\bar{F}(q)[1-qz(q)]}{\bar{F}(k_s)[1-M]} \frac{\partial \bar{y}_b}{\partial r_s}$ , where  $\frac{\partial k_s}{\partial r_s}$  is from Equation (EC.13). Also,  $\frac{\partial[qz(q)]}{\partial r_s} = (z(q) + qz'(q)) \frac{\partial q}{\partial r_s} = \frac{z(q)+qz'(q)}{c} \frac{\partial \bar{y}_b}{\partial r_s}$ , where  $\frac{\partial q}{\partial r_s} \geq 0$  from Equation (EC.12). From  $0 \leq \frac{\bar{F}(q)}{\bar{F}(k_s)} \leq 1$ ,  $0 \leq \frac{1-qz(q)}{1-M} \leq 1$  and  $wq(1+r_s)z'(k_s) + z(k_s) \leq qz'(q) + z(q)$ , we have  $-\frac{\partial[qz(q)]}{\partial r_s} + \frac{1-qz(q)}{1-M} \frac{\partial M}{\partial r_s} \leq 0$ . Then,  $\partial[\frac{1-qz(q)}{1-M}]/\partial r_s = \frac{1}{1-M} \{-\frac{\partial[qz(q)]}{\partial r_s} + \frac{1-qz(q)}{1-M} \frac{\partial M}{\partial r_s}\} \leq 0$ . As  $q$  increases in  $r_s$  so that  $\bar{F}(q)$  decreases in  $r_s$ ,  $D$  decreases in  $r_s$ .

Since  $\frac{\partial \bar{y}_b}{\partial r_s} \geq 0$  and decreases in  $r_s$ ,  $[D - \delta_r(C_r)] \frac{\partial \bar{y}_b}{\partial r_s}$  decreases in  $r_s$ , as long as it is nonnegative. Then,  $\Pi^o$  is quasi-concave in  $r_s$  if  $\frac{y_r + \bar{y}_b}{G}$  increases in  $r_s$ . We have  $\partial(\frac{y_r + \bar{y}_b}{G})/\partial r_s = \frac{\bar{F}(k_s)}{(1-M)^2} \{(y_r + \bar{y}_b) \frac{\partial M}{\partial r_s} + [\frac{\partial \bar{y}_b}{\partial r_s} - (y_r + \bar{y}_b)z(k_s) \frac{\partial k_s}{\partial r_s}](1-M)\} = \frac{\bar{F}(k_s)}{1-M} \{\frac{\partial \bar{y}_b}{\partial r_s} + \frac{(y_r + \bar{y}_b)^2 z(k_s)}{1-M} J\}$ , where  $J = 1 + \frac{M}{y_r + \bar{y}_b} [1 + \frac{z'(k_s)}{z^2(k_s)}] \frac{\partial k_s}{\partial r_s}$ .

For  $r_s \in (r_s^1, r_s^2)$ , from Equation (11b),  $\frac{\partial \Pi^o}{\partial r_s} = (1 - \rho_s(C_s))(1 - \rho_r(C_r)) \{\bar{F}(k_s) \frac{\partial k_s}{\partial r_s} - (1 + \delta_r(C_r)) \frac{\partial \bar{y}_b}{\partial r_s}\}$ . As long as  $\frac{\partial \Pi^o}{\partial r_s} \geq 0$ , we have  $\frac{\partial k_s}{\partial r_s} \geq 0$  so that  $J \geq 0$  and  $\partial(\frac{y_r + \bar{y}_b}{G})/\partial r_s \geq 0$ . Since  $r_s \geq \delta_r(C_r)$  and  $\frac{\partial \Pi^o}{\partial r_s}$  is continuous in  $r_s$ ,  $\Pi^o$  is quasi-concave in  $r_s$ . For  $r_s \in [0, r_s^1)$ , from  $\frac{\partial k_s}{\partial r_s}$  in Equation (EC.10),  $J = \frac{P[1-2M-M(z'(k_s)/z^2(k_s))] - [c(1+\alpha)(1-M)]^2 z(k_s)}{(1-M)\{P-c^2(1+\alpha)^2[wq(1+r_s)z'(k_s)+z(k_s)]\}}$ , where  $\alpha = \alpha_1$ ,  $P = \bar{F}(q)\bar{F}(k_s)[2z(q)+qz'(q)-qz^2(q)]$  and the denominator is nonnegative from the proof of Lemma EC.8. If the numerator is nonnegative, then  $J \geq 0$  and  $\frac{y_r + \bar{y}_b}{G}$  increases in  $r_s$ . Then, suppose it is negative. Thus,  $\frac{\partial \bar{y}_b}{\partial r_s} + \frac{(y_r + \bar{y}_b)^2 z(k_s)}{1-M} J \geq \frac{1}{(1+r_s)^2 z(k_s)} [1 + \frac{M^2}{1-M} J] = \frac{w^2}{G^2 M} \frac{(1+q^2 z'(q))H_1(r_s) - (1-qz(q))^2 H_0(r_s)}{P-c^2(1+\alpha)^2[wq(1+r_s)z'(k_s)+z(k_s)]}$ , where the inequality holds from  $wq - (y_r + \bar{y}_b) = \frac{k_s - \bar{k}_b}{1+r_s} \geq 0$ . Here  $H_0(r_s) = 1 - M(1-M)^2 + M^2(1-M) \frac{z'(k_s)}{z^2(k_s)} \leq 1 + q^2 z'(q)$ , since  $M^2(1-M) \frac{z'(k_s)}{z^2(k_s)} \leq q^2(w(1+r_s))^2 z'(k_s) \leq q^2 z'(q)$  from  $0 \leq M \leq 1$  and  $w(1+r_s) < 1$  (see Lemma EC.3). Also,  $H_1(r_s) = (1-M)^2 + M^2 - 2M^3 - M^3 \frac{z'(k_s)}{z^2(k_s)} \geq H_2(r_s) + (1-qz(q))^2$  where  $H_2(r_s) \equiv [1 - (\frac{c(1+\alpha)}{\bar{F}(q)})^2](1-M)^2 - M^3 - M(wq(1+r_s))^2 z'(k_s)$ . From Lemma EC.7,  $q$ ,  $k_s$ ,  $wq(1+r_s)$  and  $M$  decrease in  $y_r$ . Then,  $H_2(r_s)$  increases in  $y_r$  since  $1 - (\frac{c(1+\alpha)}{\bar{F}(q)})^2 \geq 0$ ,  $(1-M)^2$ , and  $-M^3 - M(wq(1+r_s))^2 z'(k_s)$  all increase in  $y_r$ . Thus, there is a  $y_r^4(r_s)$  so that  $H_2(r_s) \geq 0$  for  $y_r \geq y_r^4(r_s)$ . Similarly, from Lemma EC.8,  $H_2(r_s)$  increases in  $r_s$ . Consequently,  $y_r^4(r_s)$  decreases in  $r_s$ . As a result, if  $y_r \geq y_r^{22} \equiv y_r^4(0)$ , then  $H_1(r_s) \geq (1-qz(q))^2$ ,  $\partial \frac{y_r + \bar{y}_b}{G} / \partial r_s \geq 0$  so that  $\Pi^o$  is quasi-concave in  $r_s$ .  $\square$

Let  $\pi^o(r_s; C_r, C_s)$  be the retailer's equilibrium profits in the combined/trade financing region for a given  $r_s$ . Let  $\pi^\#(C_r, C_s) = \pi^o(r_s^\#(C_r, C_s); C_r, C_s)$ . Let  $x^-$  ( $x^+$ ) be the value to the left (right) of  $x$ .

LEMMA EC.12. For a fixed  $r_s \in [0, r_s^2(C_r, \alpha_2))$ , the retailer's optimal profit in the trade/combined financing region (weakly) increases in the supplier's credit rating  $C_s$ .

**Proof of Lemma EC.12:** For  $r_s \in [0, r_s^1)$ ,  $q$  and  $w$  satisfy Equations (EC.4a) and (EC.4b) where  $\alpha = \alpha_1 = \frac{\delta_s(C_s) + \rho_r(C_r)}{1 - \rho_r(C_r)}$ . Then,  $V_{C_s}^1 = \frac{c(1-M)\delta'_s(C_s)}{1 - \rho_r(C_r)} \leq 0$  and  $V_{C_s}^2 = 0$ . Let  $B = V_q^1 V_w^2 - V_w^1 V_q^2$ ,  $B_q = V_w^1 V_{C_s}^2 - V_{C_s}^1 V_w^2 \leq 0$ , and  $B_w = V_{C_s}^1 V_q^2 - V_q^1 V_{C_s}^2 \geq 0$ . Then,  $B \leq 0$ ,  $\frac{\partial q}{\partial C_s} = \frac{B_q}{B} \geq 0$ ,  $\frac{\partial w}{\partial C_s} = \frac{B_w}{B} \leq 0$ , and

$$\frac{\partial k_s}{\partial C_s} = q(1+r_s) \frac{\partial w}{\partial C_s} + w(1+r_s) \frac{\partial q}{\partial C_s} = \frac{1}{B} (1+r_s) V_{C_s}^1 [\bar{F}(q)(1-qz(q))] \geq 0, \quad (\text{EC.15})$$

$$\frac{\partial \pi^o}{\partial C_s} = (1 - \rho_r(C_r)) \left\{ \bar{F}(q) \frac{\partial q}{\partial C_s} - \bar{F}(k_s) \frac{\partial k_s}{\partial C_s} \right\} = \frac{1 - \rho_r(C_r)}{B} (1+r_s) \bar{F}(k_s) \bar{F}(q) V_{C_s}^1 [qz(q) - M] \geq 0 \quad (\text{EC.16})$$

where the inequality follows from  $w(1+r_s) < 1$  based on Lemma EC.3,  $k_s \leq q$ ,  $V_{C_s}^1 \leq 0$ , and  $B \leq 0$ .

For  $r_s \in [r_s^1, r_s^2)$ ,  $q$  and  $w$  satisfy Equations (EC.11) and (EC.4b). Then,  $V_{C_s}^3 = 0$  and  $V_{C_s}^2 = 0$ . Let  $B = V_q^3 V_w^2 - V_w^3 V_q^2$ ,  $B_q = V_w^3 V_{C_s}^2 - V_{C_s}^3 V_w^2$ , and  $B_w = V_{C_s}^3 V_q^2 - V_q^3 V_{C_s}^2$ . Then,  $\frac{\partial q}{\partial C_s} = \frac{B_q}{B} = \frac{\partial w}{\partial C_s} = \frac{B_w}{B} = 0$  and  $\frac{\partial k_s}{\partial C_s} = (1+r_s) \frac{\partial(wq)}{\partial C_s} = 0$ . From Equation (6a),  $\frac{\partial \pi^o}{\partial C_s} = (1 - \rho_r(C_r)) \left\{ \bar{F}(q) \frac{\partial q}{\partial C_s} - \bar{F}(k_s) \frac{\partial k_s}{\partial C_s} \right\} = 0$ .  $\square$

**Proof of Proposition 4:** the result follows directly from the proof of Proposition 2.  $\square$

**Proof of Proposition 5:** From  $\frac{\partial(wq(1+r_s))}{\partial C_s} = \frac{\partial k_s}{\partial C_s}$ , we have  $\partial[-\frac{(y_r+\bar{y}_b)}{G}]/\partial C_s = -\frac{(y_r+\bar{y}_b)}{(1-M)G} \{-z(k_s)(1-M)\frac{\partial k_s}{\partial C_s} + z(k_s)\frac{\partial(wq(1+r_s))}{\partial C_s} + wq(1+r_s)z'(k_s)\frac{\partial k_s}{\partial C_s}\} = -\frac{(y_r+\bar{y}_b)}{(1-M)G} \{Mz(k_s) + wq(1+r_s)z'(k_s)\}\frac{\partial k_s}{\partial C_s}$ . Note that  $\frac{\partial^2 \bar{y}_b}{\partial r_s \partial C_s} = 0$ . For  $r_s \in [0, r_s^1)$ , from Equation (EC.15),  $\frac{\partial k_s}{\partial C_s} \geq 0$ , and for  $r_s \in [r_s^1, r_s^2)$ , from the proof of Lemma EC.12,  $\frac{\partial k_s}{\partial C_s} = 0$ . Then,  $-\frac{(y_r+\bar{y}_b)}{G}$  decreases in  $C_s$ . For  $r_s \in [0, r_s^1)$ ,  $D = \alpha_1 = \frac{\delta_s(C_s) + \rho_r(C_r)}{1 - \rho_r(C_r)}$  decreases in  $C_s$ . For  $r_s \in [r_s^1, r_s^2)$ ,  $\frac{\partial q}{\partial C_s} = \frac{\partial w}{\partial C_s} = \frac{\partial k_s}{\partial C_s} = 0$  and  $D = \frac{\bar{F}(q)(1-qz(q))}{c(1-M)} - 1$  does not change in  $C_s$ .

Let  $H^o(r_s; C_s) = \frac{\Pi^o(r_s; C_r, C_s)}{1 - \rho_s(C_s)(1 - \rho_r(C_r))}$ . From Equation (EC.14a),  $\frac{\partial^2 H^o}{\partial r_s \partial C_s} \leq 0$  for  $r_s \in [0, r_s^1)$  and  $\frac{\partial^2 H^o}{\partial r_s \partial C_s} = 0$  for  $r_s \in [r_s^1, r_s^2)$ . Let  $\Delta(r_s; C_s) = H^o(r_s; C_s) - H^o(0; C_s)$ . For  $\hat{r}_s \in [0, r_s^1)$ ,  $\Delta(\hat{r}_s; C_s) = \int_0^{\hat{r}_s} \frac{\partial H^o}{\partial r_s} dr_s$  and  $\frac{\partial \Delta(\hat{r}_s; C_s)}{\partial C_s} = \int_0^{\hat{r}_s} \frac{\partial^2 H^o}{\partial r_s \partial C_s} dr_s \leq 0$ . For  $\hat{r}_s \in [r_s^1, r_s^2)$ ,  $\Delta(\hat{r}_s; C_s) = \int_0^{r_s^1} \frac{\partial H^o}{\partial r_s} dr_s + \int_{r_s^1}^{\hat{r}_s} \frac{\partial H^o}{\partial r_s} dr_s$  and  $\frac{\partial \Delta(\hat{r}_s; C_s)}{\partial C_s} = [\int_0^{r_s^1} \frac{\partial^2 H^o}{\partial r_s \partial C_s} dr_s + \frac{\partial H^o}{\partial r_s} \Big|_{r_s=r_s^1-} \cdot \frac{\partial r_s^1}{\partial C_s}] + [\int_{r_s^1}^{\hat{r}_s} \frac{\partial^2 H^o}{\partial r_s \partial C_s} dr_s - \frac{\partial H^o}{\partial r_s} \Big|_{r_s=r_s^1+} \cdot \frac{\partial r_s^1}{\partial C_s}] = \int_0^{r_s^1} \frac{\partial^2 H^o}{\partial r_s \partial C_s} dr_s \leq 0$ , where the second equality holds from  $\int_{r_s^1}^{\hat{r}_s} \frac{\partial^2 H^o}{\partial r_s \partial C_s} dr_s = 0$  and  $\frac{\partial H^o}{\partial r_s} \Big|_{r_s=r_s^1-} = \frac{\partial H^o}{\partial r_s} \Big|_{r_s=r_s^1+}$  since  $\frac{\partial H^o}{\partial r_s}$  is continuous at  $r_s^1$  implied from Equation (EC.14a). (As  $\frac{\partial \bar{y}_b}{\partial r_s}$  is discontinuous at  $r_s = \delta_r(C_r)$ ,  $\frac{\partial H^o}{\partial r_s}$  is discontinuous at  $r_s = \delta_r(C_r)$ . However, if  $r_s^1 = \delta_r(C_r)$ , then  $\frac{\partial r_s^1}{\partial C_s} = 0$ .) Thus,  $\Delta(\hat{r}_s; C_s)$  decreases in  $C_s$ .

For  $C_s \geq \delta_s^{-1}(\epsilon_r(C_r))$  so that  $\alpha_1 \leq \delta_r(C_r)$ , since  $\frac{\partial H^o}{\partial r_s} \leq 0$ ,  $\Delta(r_s; C_s) \leq 0$  for  $r_s \in (0, r_s^2)$ . For  $r_s \in [\delta_r(C_r), r_s^2)$ , it is possible that  $\Delta(r_s; C_s) > 0$  after  $C_s$  drops below a threshold  $C_s^{11}(r_s; y_r, C_r) \in [\underline{C}_s, \delta_s^{-1}(\epsilon_r(C_r))]$ . Let  $C_s^1(y_r, C_r) = \sup_{r_s \in [\delta_r(C_r), r_s^2)} \{C_s^{11}(r_s; y_r, C_r)\}$ . Then,  $H^o(r_s^\#; C_s) > H^o(0; C_s)$  so that  $\Pi^o(r_s^\#; C_r, C_s) > \Pi^o(0; C_r, C_s)$  and  $r_s^\# > 0$  if  $C_s \in [\underline{C}_s, C_s^1(y_r, C_r))$ . Otherwise,  $r_s^\# = 0$ .  $\square$

LEMMA EC.13. *For the same supplier, i.e.,  $C_s$  is fixed, the retailer's equilibrium profit in the combined/trade region increases in the supplier's interest rate  $r_s$ .*

**Proof of Lemma EC.13:** From Proposition 3, let  $r_s \in [0, r_s^2)$ . For  $r_s \in [0, r_s^1)$ , from Equations (EC.9) and (EC.10),  $\frac{\partial \pi^o}{\partial r_s} = (1 - \rho_r(C_r)) [\bar{F}(q) \frac{\partial q}{\partial r_s} - \bar{F}(k_s) \frac{\partial k_s}{\partial r_s}] = \frac{(1 - \rho_r(C_r))(y_r + \bar{y}_b) \cdot J}{\{P - [c(1 + \alpha)]^2 [z(k_s) + w(1 + r_s)qz'(k_s)]\}G}$ , where  $\alpha = \alpha_1$ ,  $P = \bar{F}(q)\bar{F}(k_s)[2z(q) + qz'(q) - qz^2(q)]$  and the denominator is nonnegative from the proof of Lemma EC.8, and  $J = -\bar{F}(q)c(1 + \alpha)wq(1 + r_s)[z'(k_s) + z^2(k_s)] + P - c^2(1 + \alpha)^2 z(k_s)(1 - M)$  for short. Substituting  $P$  and  $c(1 + \alpha)(1 - M) = \bar{F}(q)(1 - qz(q))$  (from  $V^1 = 0$ ) into  $J$  yields  $J = \bar{F}(q) \{q[\bar{F}(k_s)z'(q) - c(1 + \alpha)w(1 + r_s)z'(k_s)] + [\bar{F}(k_s)z(q) - c(1 + \alpha)wq(1 + r_s)z^2(k_s)] + (1 - qz(q))[\bar{F}(k_s)z(q) - c(1 + \alpha)z(k_s)]\} \geq 0$ , where “ $\geq$ ” holds from  $qz(q) \leq 1$ ,  $k_s \leq q$  and  $w(1 + r_s) < 1$  from Lemma EC.3,  $z(q) \geq z(k_s)$  and  $z'(q) \geq z'(k_s)$ , and  $\frac{\bar{F}(k_s)}{c(1 + \alpha_1)} \geq \frac{\bar{F}(q)}{c(1 + \alpha_1)} = \frac{1 - M}{1 - qz(q)} \geq 1$ . Then,  $\pi^o$  increases in  $r_s$ . For  $r_s \in [r_s^1, r_s^2)$ , from Equations (EC.12) and (EC.13),  $\pi^o$  increases in  $r_s$  since  $\frac{\partial \pi^o}{\partial r_s} = (1 - \rho_r(C_r)) [\bar{F}(q) \frac{\partial q}{\partial r_s} - \bar{F}(k_s) \frac{\partial k_s}{\partial r_s}] = (1 - \rho_r(C_r)) [\frac{\bar{F}(q)}{c} \frac{\partial \bar{y}_b}{\partial r_s} (1 - \frac{1 - qz(q)}{1 - M}) + \frac{y_r + \bar{y}_b}{G}] \geq 0$ .  $\square$

**Proof of Proposition 6:** For Part 1, from Proposition 3, if  $y_r \geq y_r^{21}$ ,  $r_s^\#(C_r, C_s) = 0$ . For Part 2, if  $c \leq \frac{y_r}{\hat{q}(0; C_r, \bar{C}_s)}$ , then  $\hat{q}(0; C_r, \bar{C}_s) \leq q_y(0; C_r)$ . Since  $q_y$  increases in  $r_s$  and  $\hat{q}(r_s; C_r, \alpha_2)$  decreases in  $r_s$  from Lemma EC.8,  $r_s^2 = 0$ . From Proposition 3,  $r_s^\#(C_r, C_s) = 0$ . For both parts,  $C_s^1(y_r, C_r) = \underline{C}_s$ .  $\square$

**Proof of Proposition 7:** From Proposition 3,  $r_s^\# = 0$  or  $r_s^\# \in [\delta_r(C_r), r_s^2)$  satisfying the first order condition. Therefore,  $\frac{\partial \Pi^\#(C_r, C_s)}{\partial C_r} = \frac{\partial \Pi^\#(r_s^\#; C_r, C_s)}{\partial C_r} + \frac{\partial \Pi^o(r_s; C_r, C_s)}{\partial r_s} \Big|_{r_s=r_s^\#} \cdot \frac{\partial r_s^\#}{\partial C_r} = \frac{\partial \Pi^o(r_s^\#; C_r, C_s)}{\partial C_r}$ . Then,

we can let  $r_s$  be fixed at  $r_s^\#$ . For  $r_s > \delta_r(C_r)$ , we have  $\frac{\partial \bar{k}_b}{\partial C_r} = -\frac{\delta'_r(C_r)}{(1+\delta_r(C_r))z(k_b)}$ ,  $\frac{\partial \bar{y}_b}{\partial C_r} = -\frac{\bar{y}_b \delta'_r(C_r)}{1+\delta_r(C_r)} - \frac{\delta'_r(C_r)}{(1+\delta_r(C_r))(1+r_s)z(k_b)} \geq 0$ , and  $\frac{\partial k_s}{\partial C_r} = \frac{\partial[-\bar{y}_b(1+r_s)+\bar{k}_b]}{\partial C_r} = \frac{\bar{y}_b \delta'_r(C_r)}{F(k_b)}$ . From Equations (EC.4a), (EC.4b) and (EC.11),  $V_{C_r}^1 = \Omega - c(1+\alpha_1)w(1+r_s)qz'(k_s)\frac{\bar{y}_b \delta'_r(C_r)}{F(k_b)} = \Omega - V_{y_r}^1 \frac{\bar{y}_b \delta'_r(C_r)}{(1+r_s)F(k_b)}$ , where  $\Omega = \frac{\rho'_r(C_r)}{1-\rho_r(C_r)}c(1+\alpha_1)(1-M) \leq 0$ ,  $V_{C_r}^2 = w(1+r_s)\bar{F}(k_s)z(k_s)\frac{\bar{y}_b \delta'_r(C_r)}{F(k_b)} = -V_{y_r}^2 \frac{\bar{y}_b \delta'_r(C_r)}{(1+r_s)F(k_b)} \leq 0$ , and  $V_{C_r}^3 = -\frac{\partial \bar{y}_b}{\partial C_r} \leq 0$ .

For  $r_s \in [0, r_s^1)$ , let  $B = V_q^1 V_w^2 - V_w^1 V_q^2$ ,  $B_q = -V_{C_r}^1 V_w^2 + V_w^1 V_{C_r}^2$  and  $B_w = -V_q^1 V_{C_r}^2 + V_{C_r}^1 V_q^2$ . Then,  $B \leq 0$ ,  $\frac{\partial q}{\partial C_r} = \frac{B_q}{B} = \frac{-\Omega V_w^2}{B} + L_1$ ,  $\frac{\partial w}{\partial C_r} = \frac{B_w}{B} = \frac{\Omega V_q^2}{B} + \frac{\bar{y}_b \delta'_r(C_r)}{(1+r_s)F(k_b)} \frac{V_q^1 V_{y_r}^2 - V_{y_r}^1 V_q^2}{B}$ , and  $\frac{\partial k_s}{\partial C_r} = (1+r_s)[q\frac{\partial w}{\partial C_r} + w\frac{\partial q}{\partial C_r}] + \frac{\bar{y}_b \delta'_r(C_r)}{F(k_b)} = (1+r_s)\frac{q\Omega V_q^2 - w\Omega V_w^2}{B} + L_2$ , where  $L_1 = \frac{\bar{y}_b \delta'_r(C_r)}{(1+r_s)F(k_b)} \frac{V_{y_r}^1 V_w^2 - V_w^1 V_{y_r}^2}{B}$  and  $L_2 = (1+r_s)\frac{\bar{y}_b \delta'_r(C_r)}{F(k_b)B}[-\bar{F}(k_s)V_q^1 + c(1+\alpha_1)qz(k_s)V_q^2 - c(1+\alpha_1)w^2q(1+r_s)^2\bar{F}(k_s)(z'(k_s) + z^2(k_s))]$ . From the proof of Lemma EC.7,  $L_1 \leq 0$ , and since  $V_q^1 \geq 0$ ,  $V_q^2 \leq 0$  and  $B \leq 0$ , we have  $L_2 \geq 0$ .

Let  $\Pi^o = (1 - \rho_s(C_s))H^o$ . From Equation (11a),  $\frac{\partial H^o}{\partial C_r} = -\rho'_r(C_r)\mathbb{E}[\min\{\xi, k_s\}] + (1 - \rho_r(C_r))[L_3 + (\alpha_1 - \delta_r(C_r))\frac{\partial \bar{y}_b}{\partial C_r}] - \bar{y}_b \epsilon'_r(C_r)$ , where  $L_3 = \bar{F}(k_s)\frac{\partial k_s}{\partial C_r} - c(1+\alpha_1)\frac{\partial q}{\partial C_r}$ . Since  $\rho'_r(C_r) \leq 0$  and  $\epsilon'_r(C_r) \leq 0$ , if  $L_3 \geq 0$  and  $(\alpha_1 - \delta_r(C_r))\frac{\partial \bar{y}_b}{\partial C_r} \geq 0$ , then  $\frac{\partial H^o}{\partial C_r} \geq 0$ . Note that  $L_3 = \frac{\Omega}{B}[(qV_q^2 - wV_w^2)(1+r_s)\bar{F}(k_s) + c(1+\alpha_1)V_w^2] + \bar{F}(k_s)L_2 - c(1+\alpha_1)L_1 = \bar{F}(k_s)L_2 - c(1+\alpha_1)L_1 \geq 0$ . If  $\alpha_1 \geq \delta_r(C_r)$ , then  $\frac{\partial H^o}{\partial C_r} \geq 0$ . If  $\alpha_1 < \delta_r(C_r)$ , however, Proposition 5 implies  $r_s^\# = 0 \leq \delta_r(C_r)$  and  $\bar{y}_b = \frac{\partial \bar{y}_b}{\partial C_r} = 0$ . Again,  $\frac{\partial H^o}{\partial C_r} \geq 0$ .

For  $r_s \in [r_s^1, r_s^2)$ , let  $B = V_q^3 V_w^2 - V_w^3 V_q^2 = V_q^3 V_w^2 \leq 0$ ,  $B_q = V_w^3 V_{C_r}^2 - V_{C_r}^3 V_w^2 = -V_{C_r}^3 V_w^2$ , and  $B_w = V_{C_r}^3 V_q^2 - V_q^3 V_{C_r}^2 \geq 0$ . Then,  $\frac{\partial k_s}{\partial C_r} = (1+r_s)[q\frac{\partial w}{\partial C_r} + w\frac{\partial q}{\partial C_r}] + \frac{\bar{y}_b \delta'_r(C_r)}{F(k_b)} = -\frac{\delta'_r(C_r)}{F(k_b)}\{-\frac{\bar{y}_b}{1-M} + \frac{1}{F(k_s)}[\frac{\bar{y}_b}{1+r_s} + \frac{\partial \bar{y}_b}{\partial r_s}](D+1)\}$ . From Equation (11a) or (11b),  $\frac{\partial H^o}{\partial C_r} = -\rho'_r(C_r)\mathbb{E}[\min\{\xi, k_s\}] + (1 - \rho_r(C_r))L_4 - \epsilon'_r(C_r)\bar{y}_b$ , where  $L_4 = \bar{F}(k_s)\frac{\partial k_s}{\partial C_r} - (1+\delta_r(C_r))\frac{\partial \bar{y}_b}{\partial C_r} = -\frac{\delta'_r(C_r)}{F(k_b)}\{-\frac{\bar{y}_b}{G} + \frac{\bar{y}_b}{1+r_s}(D+1) + (D - \delta_r(C_r))\frac{\partial \bar{y}_b}{\partial r_s}\} = 0$  if  $r_s^\# = 0 \leq \delta_r(C_r)$  so that  $\bar{y}_b = \frac{\partial \bar{y}_b}{\partial C_r} = 0$ . If  $r_s = r_s^\# > 0$  so that  $\frac{\partial \Pi^o(r_s; C_r, C_s)}{\partial r_s} = 0$ , then  $L_4 = -\frac{\delta'_r(C_r)}{F(k_b)}[\frac{\partial \Pi^o(r_s; C_r, C_s)}{(1-\rho_s(C_s))(1-\rho_r(C_r))} + \frac{y_r}{G} + \frac{\bar{y}_b}{1+r_s}(D+1)] \geq 0$ . In both cases, we have  $\frac{\partial H^o}{\partial C_r} \geq 0$ .  $\square$

**Proof of Proposition 8:** Let  $C_s^m$  be the worst credit rating of the supplier in  $[\underline{C}_s, C_s^1(y_r, C_r))$  for the retailer, i.e.,  $\pi^\#(C_r, C_s^m) \leq \pi^\#(C_r, C_s)$  for  $C_s \in [\underline{C}_s, C_s^1(y_r, C_r))$ . From Lemma EC.13,  $\pi^\#(C_r, C_s^m) > \pi^0(0; C_r, C_s^m)$ , i.e., the retailer receives larger expected profit when the supplier is forced to use 0 trade credit rate. From Lemma EC.12,  $\pi^0(0; C_r, C_s)$  increases in  $C_s$ . Note that  $\pi^0(0; C_r, C_s) = \pi^\#(C_r, C_s)$  for  $C_s \in [C_s^1(y_r, C_r), \bar{C}_s]$ , since  $r_s^\#(C_r, C_s) = 0$  from Proposition 5. Let  $C_s^2(y_r, C_r)$  be the largest value in  $(C_s^m, \bar{C}_s]$  so that  $\pi^0(0; C_r, C_s^2(y_r, C_r)) \leq \pi^\#(C_r, C_s^m)$ . Then,  $(C_s^1(y_r, C_r), C_s^2(y_r, C_r))$  is the supplier's credit rating hole, since  $\pi^\#(C_r, C_s) > \pi^\#(C_r, C'_s)$  for  $C_s \in [\underline{C}_s, C_s^1) \cup (C_s^2, \bar{C}_s]$  and  $C'_s \in (C_s^1, C_s^2]$ . That is, the retailer gets better profit from suppliers outside the hole than ones within the hole. Note that  $(C_s^1(y_r, C_r), C_s^2(y_r, C_r)) = \emptyset$  if  $C_s^2(y_r, C_r) \leq C_s^1(y_r, C_r)$ .

We now study the special case  $y_r = 0$ . For  $C_s \in (C_s^1, \bar{C}_s]$ ,  $r_s^\# = 0$  so that  $\bar{y}_b = \bar{k}_b = 0$ . Let  $q^\#$ ,  $w^\#$  and  $k_s^\#$  be the equilibrium quantity, wholesale price, and trade credit bankruptcy threshold, respectively. From Equation (10a),  $q^\# \bar{F}(q^\#) = w^\# q^\# \bar{F}(w^\# q^\#)$ . Then,  $w^\# = 1$ , since  $q^\# \leq \tilde{q}$ . Also,  $k_s^\# = q^\#$ . From Equation (6a),  $\pi^\#(C_r, C_s) = 0$ . Since  $z(q^\#) - w^\# z(k_s^\#) = 0$ , from Equation (EC.16),  $\frac{\partial \pi^\#(C_r, C_s)}{\partial C_s} = 0$ . Then,  $\pi^\#(C_r, C_s) = 0$  for  $C_s \in (C_s^1(0, C_r), \bar{C}_s]$  and  $C_s^2(0, C_r) = \bar{C}_s$ .

Combining the above general case  $y_r$  and special case  $y_r = 0$  together, we can conclude that there exists a threshold  $y_r^4 > 0$  so that  $(C_s^1(y_r, C_r), C_s^2(y_r, C_r)) \neq \emptyset$  for  $0 \leq y_r \leq y_r^4$ .  $\square$
